# Supplementary material for: Disease-Causing TIMP3 Variants and Deep Phenotyping of Two Czech Families with Sorsby Fundus Dystrophy Associated with Novel p.(Tyr152Cys) Mutation
Source: MDPI journal article supplement (doi:10.3390/ijms25073744), 2024-03-27
Supplement: s1 [file s1]

## SUPPLEMENTARY MATERIAL

**Supplementary Table S1:** Available evidence on variants reported as disease-causing in *TIMP3* (RefSeq NM\_000362.5).

| Description |               | ACMG/AMP classification (criteria applied)                                                           | Description in the first report                                                                             |               | Reported phenotype                  | Comment to changes in variant description compared to the original publication                            | Ref.          |
|-------------|---------------|------------------------------------------------------------------------------------------------------|-------------------------------------------------------------------------------------------------------------|---------------|-------------------------------------|-----------------------------------------------------------------------------------------------------------|---------------|
| DNA         | Protein       |                                                                                                      | DNA level                                                                                                   | Protein level |                                     |                                                                                                           |               |
| c.29T>A     | p.(Leu10His)  | Likely pathogenic<br>(PM2_Moderate, PP3_Moderate, PS3_Supporting, PP4_Supporting, PP1_Supporting)    | c.29T>A                                                                                                     | p.(Leu10His)  | Early-onset maculopathy without CNV |                                                                                                           | [16]          |
| c.34G>C     | p.(Gly12Arg)  | Likely pathogenic<br>(PM2_Moderate, PS3_Supporting, PP4_Supporting, PP1_Strong)                      | c.34G>C                                                                                                     | p.(Gly12Arg)  | Early-onset maculopathy without CNV |                                                                                                           | [16]          |
| c.70T>C     | p.(Cys24Arg)  | Likely pathogenic<br>(PM2_Moderate, PP3_Strong, PP4_Moderate)                                        | Not provided                                                                                                | Cys24Arg      | SFD (no clinical description)       | No RefSeq or sequence trace image, however, all 5 variants in the original work correspond to NM_000362.5 | [17]          |
| c.113C>G    | p.(Ser38Cys)  | Pathogenic<br>(PM2_Supporting, PS4_Strong, PP3_Moderate, PP4_Strong, PS3_Supporting, PP1_Strong)     | Not provided                                                                                                | Ser38Cys      | SFD                                 |                                                                                                           | [17-20]       |
| c.410A>G    | p.(Tyr137Cys) | Likely Pathogenic<br>(PM2_Moderate, PP3_Moderate, PM1_Moderate)                                      | c.410A>G                                                                                                    | p.Tyr137Cys   | Retinitis pigmentosa-like, drusen   | No RefSeq but UniProt ID provided                                                                         | [21]          |
| c.439-2dup  | p.?           | Likely Pathogenic<br>(PM2_Moderate, PS4_Supporting, PP3_Supporting, PP4_Strong, PP1_Supporting)      | A single base insertion at position –2 or –1 of exon 5 which converts CAG to CAAG at the 3' splice acceptor | Not provided  | SFD                                 | No RefSeq, variant description based on sequence gel image                                                | [22]          |
| c.452A>G    | p.(Tyr151Cys) | Likely Pathogenic<br>(PM2_Moderate, PP3_Supporting, PP4_Moderate, PM1_Moderate)                      | Not provided                                                                                                | Tyr151Cys     | SFD (no clinical description)       | No RefSeq or sequence trace image, however, all 5 variants in the original work correspond to NM_000362.5 | [17]          |
| c.455A>G    | p.(Tyr152Cys) | Pathogenic<br>(PM2_Moderate, PS4_Supporting, PP3_Supporting, PP4_Strong, PM1_Moderate, PM6_Moderate) | c.455A>G                                                                                                    | p.(Tyr152Cys) | SFD                                 |                                                                                                           | Current study |
| c.484G>A    | p.(Glu162Lys) | Likely pathogenic<br>(PM2_Moderate, PP3_Moderate, PP4_Strong, PS3_Supporting, PP1_Supporting)        | c.415G>A                                                                                                    | p.(E139K)     | SFD                                 | Variant description based on sequence trace image                                                         | [23]          |
| c.484G>T    | p.(Glu162*)   | Likely pathogenic<br>(PM2_Moderate, PP4_Strong, PS3_Supporting, PP1_Supporting)                      | Not provided                                                                                                | E139X         | SFD                                 | Variant description based on sequence trace image                                                         | [24,25]       |
| c.499G>A    | p.(Asp167Asn) | VUS<br>(PM2_Moderate, PP3_Supporting, PP4_Moderate)                                                  | c.499G>A                                                                                                    | Asp167Asn     | MD or SFD (no clinical description) | No RefSeq or sequence trace image                                                                         | [26]          |

|          |               |                                                                                                       |                                                                                            |               |                                       |                                                                                                                               |         |
|----------|---------------|-------------------------------------------------------------------------------------------------------|--------------------------------------------------------------------------------------------|---------------|---------------------------------------|-------------------------------------------------------------------------------------------------------------------------------|---------|
| c.521A>G | p.(Tyr174Cys) | Pathogenic<br>(PM2_Moderate, PP3_Supporting,<br>PP1_Supporting, PP4_Strong, PM1_Moderate)             | c.452A>G                                                                                   | p.Tyr174Cys   | SFD                                   | No RefSeq or sequence trace<br>image, variant description based on<br>position of two other variants in the<br>original work  | [6]     |
| c.530A>G | p.(Tyr177Cys) | Pathogenic<br>(PM2_Moderate, PP3_Supporting, PP4_Strong,<br>PM1_Moderate, PP1_Strong)                 | c.530A>G                                                                                   | p.Tyr177Cys   | SFD                                   | No RefSeq or sequence trace image                                                                                             | [6]     |
| c.536C>G | p.(Ser179Cys) | Pathogenic<br>(PM2_Moderate, PP3_Supporting, PP4_Strong,<br>PS3_Supporting, PM1_Moderate, PP1_Strong) | Not provided                                                                               | Ser156Cys     | SFD                                   | Variant description based on<br>sequence trace image                                                                          | [24,27] |
| c.542A>G | p.(His181Arg) | Pathogenic<br>(PM2_Moderate, PP3_Supporting, PP4_Strong,<br>PP1_Strong)                               | Not provided                                                                               | His158Arg     | SFD                                   | Variant description based on<br>sequence trace image                                                                          | [28]    |
| c.545A>G | p.(Tyr182Cys) | Pathogenic<br>(PM2_Moderate, PP3_Supporting PP4_Strong,<br>PM1_Moderate, PP1_Strong)                  | Not provided                                                                               | Tyr159Cys     | SFD                                   | No RefSeq or sequence trace<br>image, variant description based on<br>a subsequent report                                     | [6,29]  |
| c.565G>T | p.(Gly189Cys) | Pathogenic<br>(PM2_Moderate, PP3_Supporting PP4_Strong,<br>PM1_Moderate, PS3_Supporting, PP1_Strong)  | c.565G>T                                                                                   | p.(Gly166Cys) | SFD                                   | Variant description based on<br>sequence trace image                                                                          | [24,30] |
| c.568G>T | p.(Gly190Cys) | Pathogenic<br>(PM2_Moderate, PP3_Strong, PP4_Strong,<br>PP1_Moderate)                                 | The substitution of T for G in the first position<br>of codon 167 of the <i>TIMP3</i> gene |               | SFD                                   | No RefSeq or sequence trace<br>image, variant description based on<br>studies published at the time of the<br>original report | [31]    |
| c.572A>G | p.(Tyr191Cys) | Likely pathogenic<br>(PM2_Moderate, PP3_Supporting, PP4_Strong,<br>PM1_Moderate)                      | Not provided                                                                               | Tyr168Cys     | SFD                                   | Variant description based on the<br>sequence trace image                                                                      | [32]    |
| c.577A>T | p.(Ser193Cys) | Likely pathogenic<br>(PM2_Moderate, PP3_Strong, PP4_Supporting,<br>PP1_Strong)                        | c.508A>T                                                                                   | Ser170Cys     | Retinitis pigmentosa-<br>like, drusen | No RefSeq or sequence trace<br>image, variant description based on<br>studies published at the time of the<br>original report | [33]    |
| c.584A>G | p.(Tyr195Cys) | Pathogenic<br>(PM2_Moderate, PP3_Strong, PP4_Strong,<br>PP1_Supporting)                               | Not provided                                                                               | Y172C         | SFD                                   | No RefSeq or sequence trace<br>image, variant description based on<br>studies published at the time of the<br>original report | [31]    |
| c.594G>T | p.(Trp198Cys) | Likely pathogenic<br>(PM2_Moderate, PP4_Moderate, PM1_Moderate)                                       | Not provided                                                                               | Trp198Cys     | SFD (no clinical<br>description)      | No RefSeq or sequence trace<br>image, however, all 5 variants in<br>the abstract correspond to<br>NM_000362.5                 | [17]    |
| c.610A>T | p.(Ser204Cys) | Pathogenic<br>(PM2_Moderate, PP3_Supporting, PP4_Strong,<br>PM1_Moderate, PP1_Strong)                 | Not provided                                                                               | Ser181Cys     | SFD                                   | Variant description based on<br>sequence trace image                                                                          | [32,34] |

**Abbreviations:** ACMG/AMP, The American College of Medical Genetics and Genomics/ Association for Molecular Pathology; RefSeq, NCBI Reference Sequence Database; VUS, variant of unknown significance; CNV, choroidal neovascular membrane; SFD, Sorsby fundus dystrophy; MD, macular dystrophy.

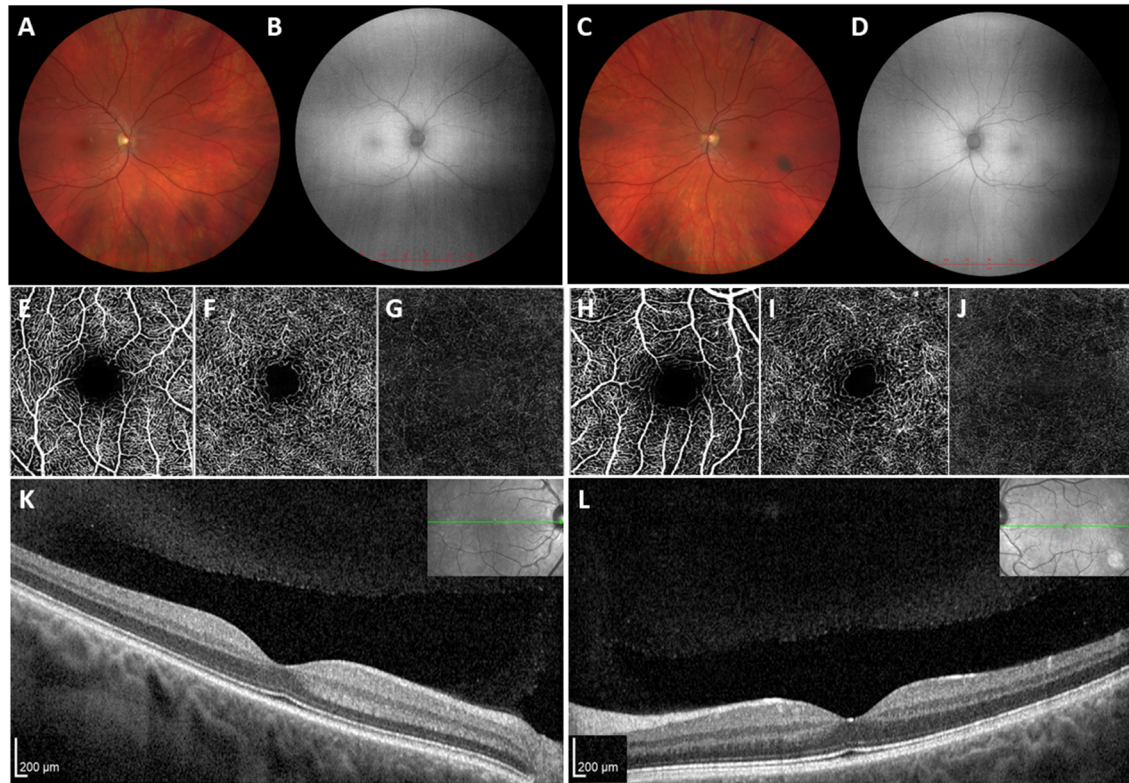

**Supplementary Figure S1:** Physiological SD-OCT and fundoscopic findings in a 30-year-old carrier of a pathogenic variant in *TIMP3* (right eye – left side, left eye – right side): (A, C) fundus photography, (B, D) FAF without a pathological signal pattern, (E through L) OCTA tomogram centred at the macula shows physiological vasculature bilaterally while (M, N) SD-OCT scans passing through foveolar area demonstrate normal architecture of the retinal layers in both eyes.

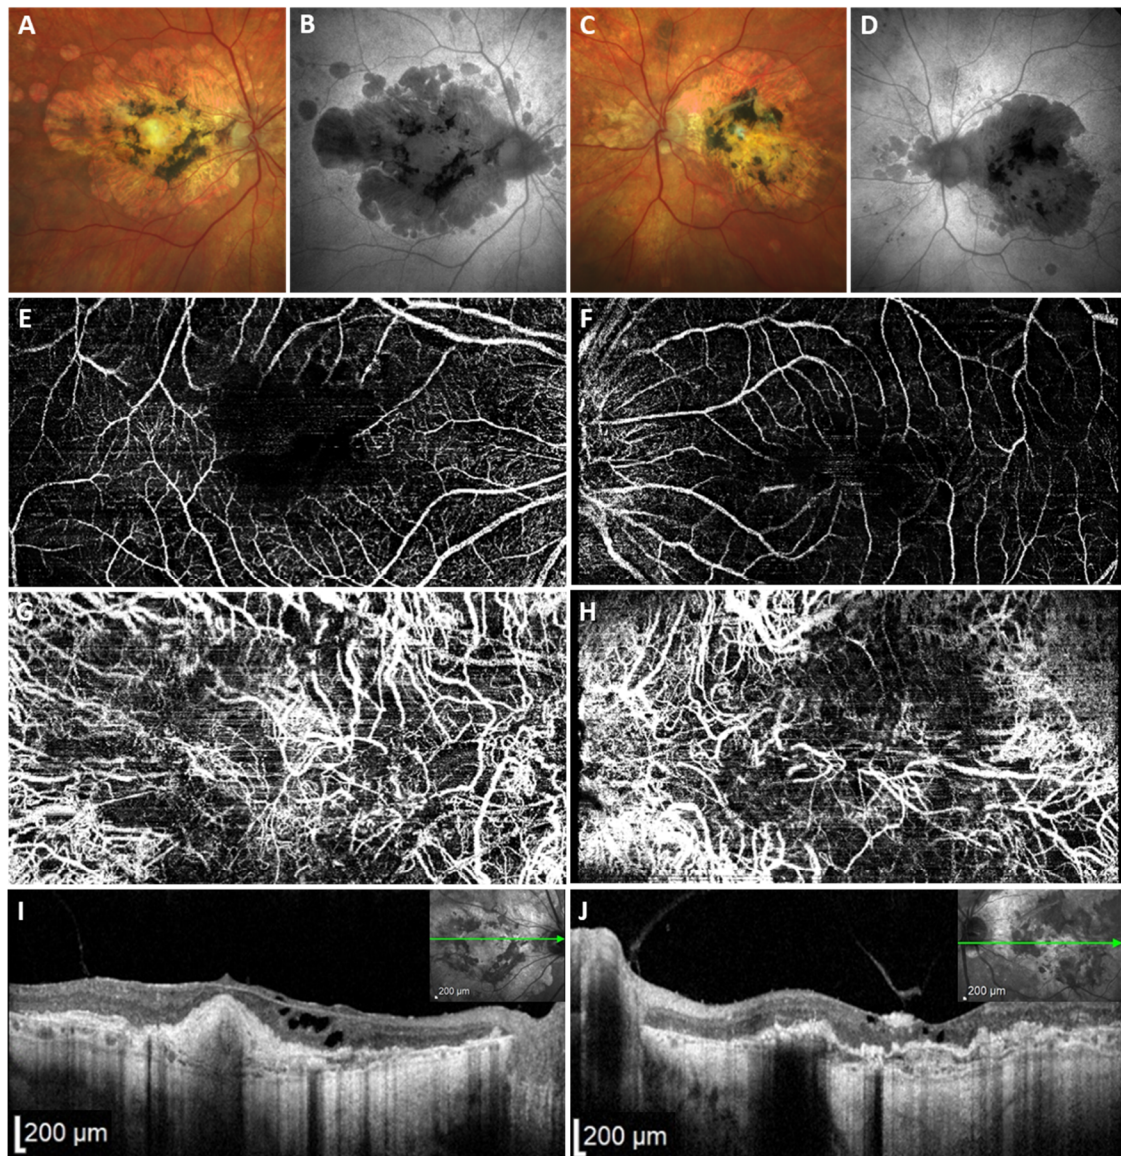

**Supplementary Figure S2:** Retinal imaging in individual II:1 from family 2. (A) Fundus photography of the right eye and (C) left eye demonstrates severe scarring and (B, D) atrophy predominantly in the macular region with a corresponding pattern of hypoautofluorescence. (E) OCTA scans of the macula demonstrate no lesion within the deep vascular complex in both the right and (F) left eye while the avascular complex layer is completely vascularized bilaterally (G, H). (I) Transversal SD-OCT scans show loss of the physiological architecture of the retinal layers in the right and (J) left eye, note severe scarring (indicated by arrows) and cystic changes (asterisks). Abbreviations: SD-OCT, spectral domain optical coherence tomography; OCTA, optical coherence tomography angiography.

## Supplementary material:

### List of genes screened in family 1

*ABCA1*, *ABCA4*, *ABCB6*, *ABHD12*, *ABHD5*, *ACBD5*, *ACO2*, *ACTB*, *ACTG1*, *ADAM9*, *ADAMTS10*, *ADAMTS17*, *ADAMTS18*, *ADGRV1*, *AGBL1*, *AGBL5*, *AGK*, *AGPS*, *AH1*, *AIPL1*, *ALDH1A3*, *ALDH18A1*, *ALMS1*, *ANOS1*, *AP3B1*, *AP3D1*, *APC*, *ARHGEF18*, *ARL13B*, *ARL2BP*, *ARL6*, *ARMC9*, *ARNT2*, *ARR3*, *ARSG*, *ASB10*, *ATF6*, *ATOH7*, *ATPIA2*, *B3GALNT2*, *B3GALT1*, *B3GLCT*, *B3GNT1*, *BBS1*, *BBIP1*, *BBS2*, *BBS5*, *BCOR*, *BDNF*, *BEST1*, *BFSP1*, *BFSP2*, *BLOC1S3*, *BLOC1S6*, *BMP4*, *BRD4*, *B9D2*, *C12orf57*, *C1QTNF5*, *C21orf2*, *C2orf71*, *C8orf37*, *CA4*, *CABP4*, *CACNA1A*, *CACNA1F*, *CACNA2D4*, *CAPN5*, *CCDC111*, *CDH23*, *CDH3*, *CDHR1*, *CEP290*, *CEP78*, *CERKL*, *CFH*, *CFI*, *CIB2*, *CISD2*, *CLN3*, *CLRN1*, *CNGA1*, *CNGA3*, *CNGB1*, *CNGB3*, *CNNM4*, *COL11A1*, *COL11A2*, *COL18A1*, *COL25A1*, *COL2A1*, *COL4A1*, *COL8A2*, *COL9A1*, *COL9A2*, *COL9A3*, *COX7B*, *CPAMD8*, *CRB1*, *CRX*, *CRYAA*, *CRYAB*, *CRYBA1*, *CRYBA2*, *CRYBA4*, *CRYBB1*, *CRYBB2*, *CRYBB3*, *CRYGB*, *CRYGC*, *CRYGD*, *CRYGS*, *CTC1*, *CTNNA1*, *CTNNB1*, *CX3CR1*, *CYP1B1*, *CYP4V2*, *DAG1*, *DCN*, *DHDDS*, *DNM1L*, *DRAM2*, *DTNBP1*, *EDNRB*, *EFEMP1*, *ELOVL4*, *EPHA2*, *ELP4*, *EYA1*, *EYS*, *FAM126A*, *FAM161A*, *FBLN5*, *FBN1*, *FBN2*, *FKRP*, *FKTN*, *FLVCR1*, *FOXC1*, *FOXE3*, *FRMD7*, *FSCN2*, *FTL*, *FYCO1*, *FZD4*, *FZD5*, *GCNT2*, *GDF3*, *GDF6*, *GJA1*, *GJA3*, *GJA8*, *GLIS3*, *GMPPB*, *GNAT1*, *NAT2*, *GNB3*, *GPR143*, *GPR179*, *GRHL2*, *GRK1*, *GRM6*, *GSN*, *GUCA1A*, *GUCA1B*, *GUCY1A1*, *GUCY2D*, *GZFI*, *HARS*, *HCCS*, *HGSNAT*, *HK1*, *HMCN1*, *HMGB3*, *HMX1*, *HPS1*, *HPS3*, *HPS4*, *HPS5*, *HPS6*, *HS6ST2*, *HSF4*, *HTRA1*, *CHM*, *CHMP4B*, *CHN1*, *CHRD1*, *CHST6*, *IDH3B*, *IDH3B*, *IFT140*, *IFT172*, *IFT27*, *IFT43*, *IMPDH1*, *IMPG1*, *IMPG2*, *INPP5E*, *IQCB1*, *ISPD*, *ITPR1*, *JAG1*, *KCNJ13*, *KCNV2*, *KERA*, *KIF11*, *KITLG*, *KIZ*, *KLHL7*, *KRT12*, *KRT3*, *LARGE*, *LCA5*, *LEMD2*, *LIM2*, *LMX1B*, *LOXL1*, *LRAT*, *LRIT3*, *LRMDA*, *LRP5*, *LRPAP1*, *LSS*, *LTBP2*, *LYST*, *MAB21L2*, *MAF*, *MAFB*, *MAK*, *MC1R*, *SNX3*, *MERTK*, *MFRP*, *MIP*, *MITF*, *MSTO1*, *MTPAP*, *MVK*, *MYO7A*, *MYOC*, *NAA10*, *NDP*, *NDUFB11*, *NDUFS1*, *NEK2*, *NHS*, *NHS*, *NMNAT1*, *NOTCH2*, *R2E3*, *R2F1*, *NRL*, *NTF4*, *NYX*, *OAT*, *OCA2*, *OFD1*, *OPA1*, *OPA3*, *OPN1LW*, *OPN1MW*, *OPN1SW*, *OPTN*, *OTX2*, *OVOL2*, *P3H2*, *P4HA2*, *PAX2*, *PAX3*, *PAX6*, *PCARE*, *PCDH15*, *PCYT1A*, *PDE6A*, *PDE6B*, *PDE6C*, *PDE6G*, *PDE6H*, *PDZD7*, *PEX26*, *PEX7*, *PHYH*, *PIK3R1*, *PIKFYVE*, *PITPNM3*, *PITX2*,



*PITX3, PLA2G5, PLK4, PMM2, POC1B, POLG, POMGNT1, POMGNT2, POMK, POMT1, POMT2, PORCN, PRCD, PRDM13, PRDM5, PROM1, PRPF3, PRPF31, PRPF4, PRPF6, PRPF8, PRPH2, PRPS1, PRSS56, PXDN, RAB18, RAB28, RAB3GAP1, RAB3GAP2, RARB, RAX, RAX2, RBP3, RBP4, RCBTB1, RD3, RDH11, RDH12, RDH5, REEP6, RGR, RGS9, RGS9BP, RHO, RIMS1, RLBP1, ROM1, RP1, RP1L1, RP2, RP9, RPE65, RPGR, RPGRIP1, RPGRIP1L, RS1, RTN4IP1, SAG, SALL2, SALL4, SCAPER, SCO2, SDCCAG8, SEMA4A, SH3PXD2B, SHH, SIPA1L3, SIX6, SLC16A12, SLC24A1, SLC24A5, SLC25A4, SLC38A8, SLC39A5, SLC45A2, SLC4A11, SLC7A14, SLITRK6, SMOC1, SNAI2, SNRNP200, SNX3, SOX1, SOX10, SOX2, SPATA7, SRD5A3, STRA6, TACSTD2, TBC1D20, TCF4, TDRD7, TEAD1, TEK, TENM3, TFAP2A, TGFBI, TIMP3, TINF2, TMEM126A, TMEM5, TMEM98, TOPORS, TRIM44, TRNT1, TRPM1, TSPAN12, TTC8, TTLL5, TUB, TUBGCP4, TUBGCP6, TULP1, TYR, TYRP1, UBIAD1, UNC119, UNC45B, USH1C, USH1G, USH2A, VAX1, VCAN, VIM, VSX1, VSX2, WDR36, WFS1, WHRN, WT1, XYLT2, YAP1, YME1L1, ZEB1, ZNF408, ZNF423, ZNF469, ZNF513, ZNF644, C5orf42, CASK, CC2D2A, CENPF, CEP104, CEP164, CEP41, CFAP410, CFB, CLDN19, COL17A1, CSPP1, CST3, CTDPI, CYP27A1, CYP51A1, DDX59, DHCR7, DNMBP, EED, EPG5, EPHA2, FAR1, FGF8, FGFR1, FLNA, FLN1), FOXD3, FRAS1, FREM1, FREM2, GALK1, GALT, GFER, GLI2, GLI3, GNPAT, GNPTG, GRIP1, GTF2H5, HESX1, HTRA2, HYLS1, CHD7, IARS2, INPP5K, ITM2B, JAM3, KIAA0586, KIF7, KIT, KMT2D, LAMB2, LCAT, LHX3, LHX4, LONP1, LOXL3, LRP2, LZTFL1, MAN2B1, MED25, MIPEP, MKKS, MKS1, MLPH, MSMO1, MYH9, MYO5A, NF2, NPHP1, NPHP3, NPHP4, OCRL, PANK2, PANK4, PEX1, PEX10, PEX11B, PEX12, PEX13, PEX14, PEX16, PEX19, PEX2, PEX3, PEX5, PEX6, PITX1, POLA1, POU1F1, PROKR2, ROP1, PTCH1, PUF60, RAB27A, SACS, SC5D, SCLT1, SETX, SIL1, SLC2A1, SLC33A1, SMO, SOX3, STN1, STS, STS, TAX1BP3, TGFBI, TLR4, TMEM237, TP63, TRAF3IP1, TRIM32, UBIAD1, VPS13B, WDPCP, WDR19, WRN, ZBTB20*
